1 **Title:**

2 **The rice OsERF101 transcription factor regulates the NLR Xa1-mediated**  
3 **perception of TAL effectors and Xa1-mediated immunity**

4

5 **Authors:**

6 Ayaka Yoshihisa<sup>1,\*</sup>, Satomi Yoshimura<sup>1,\*</sup>, Motoki Shimizu<sup>2</sup>, Sayaka Sato<sup>1</sup>, Akira Mine<sup>3</sup>,  
7 Koji Yamaguchi<sup>1</sup>, and Tsutomu Kawasaki<sup>1,4,‡</sup>

8

9 **Affiliations:**

10 <sup>1</sup>Department of Advanced Bioscience, Graduate School of Agriculture, Kindai University,  
11 Nakamachi, Nara 631-8505, Japan.

12 <sup>2</sup>Division of Genomics and Breeding, Iwate Biotechnology Research Center, Iwate 024-  
13 0003 Japan

14 <sup>3</sup>Graduate School of Agriculture, Kyoto University, Kyoto 606-8502, Japan

15 <sup>4</sup>Agricultural Technology and Innovation Research Institute, Kindai University,  
16 Nakamachi, Nara 631-8505, Japan.

17

18 \*These authors contributed equally to this work and first co-authors.

19

20 ‡Correspondence

21 Tsutomu Kawasaki

22 Department of Advanced Bioscience, Graduate School of Agriculture, Kindai University,  
23 3327-204 Nakamachi, Nara 631-8505, Japan.

24 Phone/FAX +81-742-43-7335; E-mail: t-kawasaki@nara.kindai.ac.jp

25

26

27 Total word count (excluding summary, reference and legends) 4,961

28 Summary: 195, Introduction: 733, Materials and Methods: 775

29 Results: 2,140, Discussion: 1,156, Acknowledgements: 121

30 No. of figures: 6 (all in color)

31 No. Table: 0

32 No of Supporting Information files 7 (Fig. S1-S4; Table S1-S3)

33

1 **Summary**

2 ·Plant nucleotide-binding leucine-rich repeat receptors (NLRs) initiate immune  
3 responses and the hypersensitive response by recognizing pathogen effectors. *Xa1*  
4 encodes an NLR with an N-terminal BED domain, and recognizes transcription activator-  
5 like (TAL) effectors of *Xanthomonas oryzae* pv. *oryzae* (*Xoo*). The molecular  
6 mechanisms controlling the recognition of TAL effectors by *Xa1* and the subsequent  
7 induction of immunity remain poorly understood.

8 ·*Xa1* interacts in the nucleus with two TAL effectors via the BED domain. We identified  
9 the AP2/ERF-type transcription factor OsERF101/OsRAP2.6 as an interactor with *Xa1*,  
10 and found that it also interacts with the TAL effectors.

11 Overexpression of *OsERF101* exhibited an enhanced resistance to an incompatible *Xoo*  
12 strain only in the presence of *Xa1*, indicating that *OsERF101* functions as a positive  
13 regulator of *Xa1*-mediated immunity. Unexpectedly, *oserf101* mutants also showed  
14 enhanced *Xa1*-dependent resistance, but in a different manner from the overexpressing  
15 plants. This result revealed an additional *Xa1*-mediated immune pathway that is  
16 negatively regulated by *OsERF101*. Furthermore, *OsERF101* directly interacted with the  
17 TAL effectors.

18 ·Our results show that *OsERF101* regulates the recognition of TAL effectors and the *Xa1*-  
19 mediated activation of the immune response. These data provide new insights into the  
20 molecular mechanism of NLR-mediated immunity in plants.

21

22

23 **Keyword:**

24 immunity, NLR, TAL effector, rice, *Xanthomonas*, SWEET

25

## 1 Introduction

2 Plants have developed two tiers of immune systems to defend against pathogen  
3 infection. The first tier is initiated through recognition of microbe-associated molecular  
4 patterns by plasma membrane-localized pattern recognition receptors. This is referred  
5 to as pattern triggered immunity (Dangl *et al.*, 2013). To inhibit pattern triggered immunity  
6 or to improve the nutrient conditions suitable for pathogen proliferation, pathogens  
7 deliver a variety of effectors into plant cells (Dou & Zhou, 2012). For the second tier of  
8 immune responses, plants have evolved a family of nucleotide-binding (NB) leucine-rich  
9 repeat (LRR) receptors (NLRs) that directly or indirectly recognize pathogen effectors  
10 (Jones *et al.*, 2016). This is referred to as effector triggered immunity. Effector triggered  
11 immunity often involves a hypersensitive cell death response (HR). Several NLRs  
12 indirectly recognize pathogen effectors by interacting with host factors. These host  
13 factors are defined as “sensing decoys” that mimic the targets of pathogen effectors and  
14 act as co-receptors with the NLRs (Paulus & van der Hoorn, 2018).

15 *Xanthomonas oryzae* pv. *oryzae* (*Xoo*) causes rice bacterial blight disease, one  
16 of the most important rice diseases in the world. *Xoo* has developed transcription-  
17 activator like (TAL) effectors to facilitate bacterial growth. TAL effectors contain a central  
18 region of polymorphic repeats (central repeat region (CRR)) with each repeat consisting  
19 of 34 amino residues, several nuclear localization signals (NLSs), and an activation  
20 domain at the C terminus. Each of the repeats in the CRR specifies a nucleotide for  
21 binding (Boch *et al.*, 2009; Moscou & Bogdanove, 2009). *Xoo* secretes TAL effectors into  
22 rice cells through a type III secretion system, and then the TAL effectors localize to the  
23 host nuclei in order to regulate expression of certain host genes. One of the *Xoo* TAL  
24 effectors, AvrXa7, accelerates expression of the *SWEET14* gene, which encodes a  
25 plasma membrane-localized sugar transporter (Antony *et al.*, 2010). The enhanced  
26 accumulation of *SWEET14* protein increases the efflux of sugars from the cytoplasm to  
27 the apoplast, and this provides additional nutrients for the pathogen (Naseem *et al.*,  
28 2017). This process is very important for bacterial virulence, because defects in the  
29 expression of *SWEET14* greatly reduce bacterial growth (Oliva *et al.*, 2019).

30 The bacterial blight disease resistance gene *Xa1* was identified originally in the  
31 rice cultivar Kogyoku (Yoshimura *et al.*, 1998). It encodes an NLR protein with an N-  
32 terminal BED-type zinc finger domain. *Xa1* recognizes TAL effectors and induces  
33 immune responses including the HR (Ji *et al.*, 2016), but the mechanisms for these  
34 processes have not been elucidated. Recently, alleles of *Xa1* called *Xa2*, *Xa14*, *Xa45*,  
35 and *Xo1* have been isolated (Ji *et al.*, 2020; Read *et al.*, 2020; Zhang *et al.*, 2020). Their  
36 predicted protein structures indicate that the BED and NB regions are highly conserved,

1 but their C-terminal LRR regions are distinguished by the number of repeats. This  
2 suggests that the LRR regions may determine the interactions with TAL effectors (Read  
3 *et al.*, 2020).

4 The immune responses induced when Xa1 and its allelic NLR proteins  
5 recognize TAL effectors can be suppressed by interfering TAL (iTAL) effectors, also  
6 referred to as truncated TAL (truncTAL) effectors (Ji *et al.*, 2016; Read *et al.*, 2016; Ji *et*  
7 *al.*, 2020). iTAL effectors lack the activation domain but retain the NLSs. iTAL effectors  
8 can be classified into two types (A and B) based on their structures (Ji *et al.*, 2016; Read  
9 *et al.*, 2016). However, the molecular mechanisms by which iTAL effectors suppress Xa1-  
10 mediated immunity remain to be revealed.

11 Rice contains 139 AP2/ERF-type transcription factors (Nakano *et al.*, 2006). The  
12 ERF transcription factors are involved in a variety of cellular processes including  
13 development and responses to biotic and abiotic factors. The OsERF101/OsRAP2.6  
14 transcription factor has been reported to participate in resistance to rice blast (Wamaita  
15 *et al.*, 2012), leaf senescence (Lim *et al.*, 2020), and drought stress (Jin *et al.*, 2018).

16 In this study, we found that the BED domain of Xa1 forms a complex with two  
17 TAL effectors, AvrXa7 and Xoo1132. To understand the molecular mechanism of Xa1-  
18 mediated immunity, we screened for proteins that interact with Xa1, and identified  
19 OsERF101. We investigated the interactions between OsERF101 and Xa1 in plants. We  
20 also analyzed Xa1-dependent resistance and TAL effector-induced gene expression  
21 using plants that overexpressed *OsERF101* and plants carrying knockout mutations of  
22 *OsERF101*. Furthermore, we found that OsERF101 directly interacts with the TAL  
23 effectors. The results of these experiments suggest that OsERF101 is likely involved in  
24 both effector recognition and immune activation mediated by Xa1.

25

## 1 **Materials and Methods**

### 2 **Plant materials**

3 Rice (*Oryza sativa*) *Japonicum* cultivars Kogyoku and Nipponbare were used  
4 as the wild-type plants. The *xa1* and *oserf101* mutants were generated using the  
5 CRISPR/Cas9 system as described below. The *OsERF101*-OX plants were generated  
6 as described below.

7

### 8 **Plant Transformation**

9 To construct the plasmids for the CRISPR/Cas9 system, we used the guide RNA  
10 cloning vector pU6gRNA and the all-in-one Cas9/gRNA vector  
11 pZDgRNA\_Cas9ver.2\_HPT, which were kindly provided by Dr. Masaki Endo (Mikami *et*  
12 *al.*, 2015). The 20 bp sequences from 108 to +127 of *Xa1* (5'-  
13 GCAACTGGTCTGCAAAGATC-3') and from 206 to +225 of *OsERF101* (5'-  
14 GTGTTTCGACAGCGCCATGG-3') were selected as the target sites of Cas9 by using  
15 the CRISPR-P website (<http://cbi.hzau.edu.cn/cgi-bin/CRISPR>). These DNA fragments  
16 were cloned into pU6gRNA, and then subcloned into pZDgRNA\_Cas9ver.2\_HPT  
17 (Mikami *et al.*, 2015). Calli generated from rice embryos were transformed using  
18 *Agrobacterium tumefaciens* EHA101 carrying each construct, as described previously  
19 (Hiei *et al.*, 1994). To confirm the mutations, the genomic regions containing the Cas9  
20 target sites were amplified by PCR and sequenced as previously described (Mikami *et*  
21 *al.*, 2015). For overexpression, the entire coding region of *OsERF101* was amplified with  
22 gene specific primers (Table S1) using cDNAs prepared from Kogyoku leaves as the  
23 templates, and the PCR product was cloned into the binary vector pGWB2 (Nakagawa  
24 *et al.*, 2007). In the resulting construct, the *OsERF101* gene was driven by the CaMV  
25 35S promoter. Calli generated from rice embryos were transformed with the construct as  
26 described previously (Hiei *et al.*, 1994).

27

### 28 **Transient assays using rice protoplasts**

29 Protoplasts were isolated from cultured rice cells by digestion of the cell walls  
30 with Cellulase RS (Yakult) and Macerozyme R-10 (Yakult) as described previously  
31 (Yamaguchi *et al.*, 2013). Aliquots (100  $\mu$ l) of protoplasts ( $2.5 \times 10^6$  cells / ml) were  
32 transformed with plasmid DNA using the polyethylene glycol (PEG) method (Chen *et al.*,  
33 2010). For subcellular localization analysis and BiFC analysis, transfected protoplasts  
34 were observed using a fluorescence microscope, the Axio Imager M2 (Carl Zeiss) with  
35 the ApoTome2 system (Carl Zeiss). The BiFC analyses were carried out as reported  
36 previously (Yamaguchi *et al.*, 2013).

1

## 2 **Split NanoLuc Luciferase complementation assay**

3 DNA fragments of *Xa1*, *BED*, *NB*, *LRR*, *AvrXa7*, and *Xoo1132* were transferred  
4 into *p35S-LgBiT-T7-GW* or *p35S-SmBiT-T7-GW* using the Gateway system with LR  
5 clonase reactions (Taoka *et al.*, 2021). The Firefly *Luciferase* gene controlled by the  
6 CaMV 35S promoter was used as an internal control. The constructs were transfected  
7 into rice protoplasts as described above. After 18 h incubation at 30°C, the activities of  
8 the Firefly and NanoLuc luciferases were measured in a TriStar2 LB942 luminometer  
9 (Berthold) using the ONE-Glo Luciferase Assay System (Promega) and the Nano-Glo  
10 Live Cell Assay System (Promega).

11

## 12 **Yeast two-hybrid assays**

13 The yeast two-hybrid screening and interaction assays were based on the  
14 requirement for histidine for yeast growth, as described previously (Ishikawa *et al.*, 2014).

15

## 16 **Protein extraction and immunoblotting**

17 Total proteins were extracted from rice protoplasts in a buffer including 50 mM  
18 Tris-HCl pH 7.5, 1 mM EDTA, and a protease inhibitor cocktail (Roche), and analyzed by  
19 immunoblotting with  $\alpha$ -HA,  $\alpha$ -Lg, and  $\alpha$ -T7.

20

## 21 **Pathology Assays**

22 Fully expanded rice leaves were inoculated with *Xoo* T7174 or *Xoo* T7133 by  
23 infiltration of the bacterial suspension ( $OD_{600} = 0.25$ ) with a needleless syringe. The  
24 bacterial populations in the leaves after infiltration were analyzed by quantitative real-  
25 time PCR. The DNA levels of the *Xoo XopA* gene relative to those of the rice *ubiquitin*  
26 gene were measured using genomic DNAs purified from the infected leaves.

27

## 28 **RNA isolation and quantitative real time PCR**

29 Total RNA was isolated from rice leaves using TRIzol reagent (Invitrogen) and  
30 then treated with RNase-free DNase I (Roche). First-strand cDNA was synthesized from  
31 1  $\mu$ g total RNA using an oligo-dT primer and ReverTra Ace reverse transcriptase  
32 (Toyobo). Expression levels were measured by quantitative real time PCR using the  
33 SYBR Green master mix (Applied Biosystems) in a Step-One Plus Real-Time PCR  
34 system (Applied Biosystems). The expression levels were normalized against a *ubiquitin*  
35 reference gene. Three biological replicates were used for each experiment, and two  
36 quantitative replicates were performed for each biological replicate.

1

2 **RNA-seq**

3           Total RNA was used to make sequencing libraries using a NEBNext Ultra RNA  
4 Library Prep Kit for Illumina (NEB, USA) according to the manufacturer's instructions.  
5 Subsequently, the libraries were sequenced using an Illumina HiSeq4000 platform to  
6 obtain 150 bp paired-end reads. FaQCs (Lo & Chain, 2014) software was used to filter  
7 high quality reads from the generated sequence reads. The filtered reads were aligned  
8 with the rice reference sequence for Nipponbare  
9 ([http://rice.plantbiology.msu.edu/pub/data/  
10 Eukaryotic\\_Projects/o\\_sativa/annotation\\_dbs/pseudomolecules/version\\_7.0/all.dir/all.c](http://rice.plantbiology.msu.edu/pub/data/Eukaryotic_Projects/o_sativa/annotation_dbs/pseudomolecules/version_7.0/all.dir/all.c)  
11 on) using Hisat2 (Kim *et al.*, 2015) software, and counted for each gene using  
12 FeatureCounts (Liao *et al.*, 2014) software. DEGs were detected using a TCC package  
13 (Sun *et al.*, 2013).  
14

## 1 Results

### 2 Xa1 interacts with TAL effectors in the rice nucleus.

3 In order to analyze the interactions between Xa1 and TAL effectors, we first used  
4 Xa1 protein fusions with green fluorescence protein (GFP) to determine their subcellular  
5 localization in transiently expressing rice protoplasts. GFP was fused to the N terminus  
6 of full length Xa1<sup>1-1,802</sup> and four different Xa1 regions, Xa1<sup>1-325</sup>, Xa1<sup>1-1,012</sup>, Xa1<sup>312-1,012</sup>, and  
7 Xa1<sup>1,008-1,802</sup>. These four regions contained the BED, BED-NB, NB, and LRR domains,  
8 respectively (Fig. 1a). GFP- Xa1<sup>1-325</sup> and GFP- Xa1<sup>1-1,012</sup> were localized mainly in the  
9 nucleus (Fig. 1b,c). GFP- Xa1<sup>1-1,802</sup> was detected in both the nucleus and the cytoplasm,  
10 while GFP- Xa1<sup>312-1,012</sup> and GFP- Xa1<sup>1,008-1,802</sup> were localized only in cytoplasm. Thus, it  
11 is likely that BED possesses a nuclear-localization activity, which is consistent with a  
12 recent report (Zhang *et al.*, 2020).

13 The *Xoo* strain T7174 (also called MAFF311018)(Ochiai *et al.*, 2005) is  
14 incompatible with the rice cultivar Kogyoku, which carries Xa1. *Xoo* T7174 contains 16  
15 TAL effectors including AvrXa7 and Xoo1132 (Ochiai *et al.*, 2005). AvrXa7 and Xoo1132  
16 have 98.9% sequence identity between their N-terminal regions and 98.4% identity  
17 between their C-terminal regions, and they have 22.5 and 12.5 repeats in their central  
18 repeat regions, respectively (Fig. 1d and Fig. S1). AvrXa7 and Xoo1132 were each fused  
19 to GFP and transiently expressed in rice protoplasts. Fluorescence from both constructs  
20 was detected in the nuclei (Fig. 1e). The N-terminal region (1–277 aa) and C-terminal  
21 region (871–1,002 aa) of Xoo1132 were also each fused to GFP. Xoo1132<sup>871-1,002</sup>-GFP  
22 was localized in the nucleus whereas Xoo1132<sup>1-277</sup>-GFP was detected in both the  
23 nucleus and the cytoplasm, as was also observed for the GFP control (Fig. 1e). This  
24 result was consistent with the fact that three nuclear localization signals (NLSs) exist at  
25 the C-terminal region of Xoo1132.

26 We next performed bi-molecular fluorescence complementation (BiFC)  
27 experiments to examine the interactions of Xa1 with AvrXa7 and Xoo1132. Full length  
28 Xa1<sup>1-1,802</sup> protein was tagged with the C-terminal domain of Venus (Xa1<sup>1-1,802</sup>-Vc).  
29 Xoo1132 and AvrXa7 were each tagged with the N-terminal domain of Venus (Xoo1132-  
30 Vn and AvrXa7-Vn). However, when Xa1<sup>1-1,802</sup>-Vc was co-expressed with Xoo1132-Vn or  
31 AvrXa7-Vn in rice protoplasts, we failed to detect any fluorescence (Fig. 2a). Since it is  
32 possible that the tertiary structure of Xa1 might weaken the interaction with these TAL  
33 effectors, we tagged each of the Xa1 domains Xa1<sup>1-325</sup>, Xa1<sup>312-1,012</sup>, and Xa1<sup>1,008-1,802</sup> with  
34 the N-terminal domain of Venus and used them in the BiFC experiments. Fluorescence  
35 was detected in the nuclei when Xa1<sup>1-325</sup>-Vc was co-expressed with Xoo1132-Vn or  
36 AvrXa7-Vn, but not when AvrXa7-Vn was co-expressed with Xa1<sup>312-1,012</sup>-Vc or Xa1<sup>1,008-</sup>



1 <sup>1,802</sup>-Vc (Fig. 2a). These data suggest that the BED domain of Xa1 associates with these  
2 TAL effectors. We also co-expressed Xa1<sup>1-325</sup>-Vc with constructs containing Vn linked to  
3 either the N-terminal or C-terminal regions of Xoo1132 (Xoo1132<sup>1-277</sup> or Xoo1132<sup>871-1,002</sup>,  
4 respectively). The BED (Xa1<sup>1-325</sup>) domain interacted with Xoo1132<sup>871-1,002</sup>, but not with  
5 Xoo1132<sup>1-277</sup> in the nucleus (Fig. 2a), even though the GFP constructs indicated that  
6 Xoo1132<sup>1-277</sup> and Xoo1132<sup>871-1,002</sup> are localized the nucleus (Fig. 1e).

7 To analyze the strength of the interaction between Xa1 and the TAL effectors,  
8 we carried out a split NanoLuc luciferase complementation assay (Taoka *et al.*, 2021).  
9 Xa1 and its fragments were fused to the Large BiT of NanoLuc Luciferase (LgBiT, 159  
10 aa), and AvrXa7 and Xoo1132 were each fused to the Small BiT (SmBiT, 12 aa). The  
11 constructs were transfected into rice protoplasts with the *35S-Firefly Luciferase (Fluc)*  
12 construct, and the activities of both luciferases were measured using a microplate  
13 luminometer. Consistent with the BiFC experiments, Xa1<sup>1-325</sup> (the BED domain) strongly  
14 interacted with both TAL effectors (Fig. 2b). Xa1<sup>1-1,802</sup> interacted weakly but significantly  
15 with Xoo1132 when compared with the negative control (Fig. 2b). In addition, Xa1<sup>312-1,802</sup>  
16 and Xa1<sup>1,008-1,802</sup> displayed weak interaction with Xoo1132. AvrXa7 also exhibited similar  
17 interaction pattern as Xoo1132 (Fig. 2c). These data suggest that the BED domain of  
18 Xa1 may be the main region interacting with the TAL effectors, although the LRR domain  
19 may also be involved in the interaction.

20 The BiFC and split NanoLuc luciferase complementation experiments  
21 suggested direct interaction between the BED domain of Xa1 and the TAL effectors. To  
22 further test this possibility, we carried out yeast two-hybrid assays. However, interactions  
23 were not detected between the BED domain and either of the TAL effectors (Fig. S2).  
24 This result suggested that some host factor(s) might be required for the interaction  
25 between the BED domain and the TAL effectors.

### 27 **OsERF101 interacts with Xa1**

28 To identify host factors involved in the Xa1-mediated immune response, we  
29 screened for Xa1 interactors using a yeast two-hybrid assay with the BED domain (Xa1<sup>1-</sup>  
30 <sup>325</sup>) and a rice cDNA library. Initially, we identified twelve candidates (Table S2). Among  
31 them, we selected the AP2/ERF type transcription factor OsERF101 /OsRAP2.6  
32 (LOC\_Os04g32620). Our selection was based on the predicted subcellular localization  
33 of OsERF101 and the reproducibility of its interaction with the BED domain. Yeast two-  
34 hybrid experiments indicated that OsERF101 interacted with the BED domain but not  
35 with other Xa1 domains (Fig. 3a).

36 When the OsERF101 protein was fused with GFP (OsERF101-GFP) and

1 transiently expressed in rice protoplasts, the protein was localized to the nucleus (Fig.  
2 3b). We used BiFC assays to demonstrate *in planta* interactions between the BED  
3 domain and OsERF101 in the nucleus (Fig. 3c). In addition, we tested the interactions  
4 between Xa1 and OsERF101 using split NanoLuc luciferase complementation assays.  
5 We found that OsERF101 interacted strongly with the BED domain and weakly with the  
6 full length Xa1 protein (Fig. 3d).

### 8 **OsERF101 positively regulates bacterial blight resistance**

9 We generated an *Xa1* knockout mutant (*xa1*) in the Kogyoku background using  
10 the CRISPR/Cas9 system. The mutation was caused by the generation of a stop codon  
11 created by a two base deletion (Fig. S3a). We then used a needleless syringe-infiltration  
12 technique to introduce suspensions of *Xoo* T7174 and *Xoo* T7133 (which is compatible  
13 with Kogyoku) into the leaves of Kogyoku plants. Wild-type plants developed HR lesions  
14 with dark brown edges and weak water soaking when infiltrated with *Xoo* T7174, but  
15 showed only water soaking when infiltrated with *Xoo* T7133 (Fig. 4a). In contrast, the *xa1*  
16 mutant did not develop HR lesions when infiltrated with *Xoo* T7174. Consistent with those  
17 results, the bacterial population of *Xoo* T7174 was much greater in the *xa1* mutant than  
18 in the wild-type plants (Fig. 4b). As mentioned in the Introduction, AvrXa7 induces  
19 *SWEET14* expression by direct binding to its promoter (Antony *et al.*, 2010). We  
20 observed stronger induction of *SWEET14* expression in the *xa1* mutant than in the wild-  
21 type plants after infiltration with *Xoo* T7174 (Fig. 4c).

22 To elucidate the function of OsERF101 in bacterial blight resistance, we  
23 generated transgenic Kogyoku plants overexpressing *OsERF101* using the CaMV 35S  
24 promoter (Fig. S4). When these plants were infiltrated with the *Xoo* T7174 suspension,  
25 they exhibited a stronger HR than the wild-type plants, as indicated by the development  
26 of HR lesions without water soaking (Fig. 4a). Consistent with the stronger HR, both  
27 bacterial growth and *SWEET14* expression were reduced in the infiltrated *OsERF101*-  
28 OX plants when compared with the wild type (Fig. 4b,c). These results indicate that  
29 OsERF101 plays a positive role in resistance to bacterial blight.

### 31 **The knockout of *OsERF101* results in enhanced resistance**

32 To analyze the involvement of OsERF101 in Xa1-mediated immunity, we used  
33 the CRISPR/Cas9 system to generate two knockout mutant lines of *OsERF101* in the  
34 Kogyoku background. The lines *os erf101-1* and *os erf101-2* both carried frame-shift  
35 mutations located approximately 220 bp from the start codon (Fig. S3b). When either of  
36 these lines were infiltrated with *Xoo* T7174, they exhibited light brown lesions that had a

1 different appearance from the typical Xa1-induced HR lesion (Fig. 4a). This result was  
2 unexpected because *OsERF101* is predicted to function as a positive regulator of rice  
3 immunity. However, the bacterial growth and *SWEET14* expression were strongly  
4 suppressed in the *oserf101* mutants after infiltration with T7174 (Fig. 4b,c), as we also  
5 observed in the *OsERF101*-OX plants. Thus, both the overexpression of *OsERF101* and  
6 the knockout of *OsERF101* induced strong resistance to rice bacterial blight.

### 7 8 **The enhanced resistance of the *OsERF101*-OX and *oserf101* plants depends upon** 9 ***Xa1***

10 The *Xoo* strain T7133 is compatible with Kogyoku (Ogawa *et al.*, 1978) and  
11 produces disease lesions with water soaking when infiltrated into the leaves of Kogyoku  
12 (Fig. 4a). We determined the genome sequence of *Xoo* T7133 and found that it contains  
13 a type-A iTAL effector gene (Yoshihisa *et al.*, 2021). Thus far, all of the *Xoo* strains  
14 containing type-A iTAL effectors have been observed to inhibit Xa1-mediated immunity  
15 in rice (Ji *et al.*, 2020). Therefore, we expect that the iTAL effector of *Xoo* T7133 would  
16 also inhibit Xa1-mediated resistance.

17 We infiltrated a suspension of *Xoo* T7133 into the leaves of the *OsERF101*-OX  
18 plants. The *OsERF101*-OX leaves did not exhibit HR lesions as they did with *Xoo* T7174,  
19 but instead displayed water-soaked disease lesions (Fig. 4a). Consistent with this result,  
20 the bacterial populations of *Xoo* T7133 were increased in the *OsERF101*-OX plants, as  
21 they were in the wild-type plants and the *xa1* mutant (Fig. 5a). In addition, the expression  
22 levels of *SWEET14* in the *Xoo* T7133-infiltrated *OsERF101*-OX plants were the same as  
23 in the wild type and the *xa1* mutant (Fig. 5b). We also infiltrated a suspension of *Xoo*  
24 T7133 into the leaves of the *oserf101* knockout mutant lines. The atypical HR lesions  
25 induced by infection with *Xoo* T7174 were not observed after infection with *Xoo* T7133  
26 (Fig. 4a). As observed in the *OsERF101*-OX plants, the infiltrated *oserf101* leaves  
27 developed water-soaked disease lesions (Fig. 4a), along with wild-type levels of bacterial  
28 growth and *SWEET14* expression (Fig. 5a,b). Because the iTAL effector of *Xoo* T7133  
29 likely suppresses the immune responses induced via the recognition of TAL effectors by  
30 Xa1, these results suggest that the enhanced resistance of the *OsERF101*-OX and  
31 *oserf101* plants may be Xa1-dependent.

32 To further confirm that the enhanced resistance induced by overexpression and  
33 knockout mutations of *OsERF101* is dependent on Xa1, we generated transgenic plants  
34 overexpressing *OsERF101* and created knockout mutants of *OsERF101* in the rice  
35 cultivar Nipponbare background (Fig. S3c). Nipponbare does not possess the *Xa1* gene.  
36 The knockout mutant alleles of *OsERF101* in the Nipponbare background were named

1 *oserf101-3* and *oserf101-4*. The *OsERF101-OX* and *oserf101* Nipponbare leaves  
2 developed water-soaked disease lesions when infiltrated with *Xoo* T7174 (Fig. 5c). In  
3 addition, we analyzed the bacterial growth and expression of *SWEET14* in the  
4 Nipponbare lines after infiltration with T7174 (Fig. 5d,e). The results indicated that neither  
5 overexpression of *OsERF101* nor the *oserf101* mutation caused enhanced resistance to  
6 *Xoo* T7174 in the Nipponbare background. Thus, it is likely that the enhanced resistance  
7 induced by both overexpression and knockout mutations of *OsERF101* in the Kogyoku  
8 background is dependent on Xa1.

### 9 10 ***OsERF101* overexpression and the *oserf101* knockout mutation induce different** 11 **types of immune responses**

12 We observed that the *OsERF101-OX* lines and the *oserf101* knockout lines  
13 in the Kogyoku background displayed different types of HR lesions after infiltration with  
14 *Xoo* T7174 (Fig. 4a). This suggested that *OsERF101-OX* and *oserf101* may have  
15 different effects on the expression of downstream genes. Therefore, we carried out RNA-  
16 seq analyses using mRNAs purified from wild-type, *OsERF101-OX*, and *oserf101* leaves  
17 at 2 days after infiltration with *Xoo* T7174. We identified a total of 948 differentially  
18 regulated genes (false discovery rate < 0.1) whose expression levels in *OsERF101-OX*  
19 and/or *oserf101* were different from those in wild-type plants (Fig. 6a). Among the 381  
20 genes that were upregulated in *OsERF101-OX* and/or *oserf101* when compared with the  
21 wild type, 327 were upregulated in either *OsERF101-OX* or *oserf101*, and the remaining  
22 54 genes were upregulated in both plants. Similarly, the number of the genes down-  
23 regulated in both *OsERF101-OX* and *oserf101* was smaller than the number that were  
24 down-regulated in either *OsERF101-OX* or *oserf101* (Fig. 6a). Therefore, the  
25 overexpression of *OsERF101* affects the expression of a largely different set of  
26 downstream genes than those affected by the knockout mutation of *OsERF101*. Thus, it  
27 is likely that the mechanism by which the knockout of *OsERF101* enhances Xa1-  
28 mediated immunity is different from the mechanism by which *OsERF101* overexpression  
29 enhances immunity. These results suggest two regulatory pathways, both mediated by  
30 Xa1. In one pathway, *OsERF101* functions as a positive immune regulator, whereas the  
31 other pathway is negatively regulated by *OsERF101*.

### 32 33 ***OsERF101* interacts with the TAL effectors**

34 As described above, we did not detect direct interactions between the BED  
35 domain and the TAL effectors in yeast two-hybrid assays. This raised the possibility that  
36 *OsERF101* may function as a link between Xa1 and the TAL effectors. Therefore, we

1 looked for interactions between OsERF101 and the TAL effectors. The split NanoLuc  
2 luciferase complementation assays indicated that OsERF101 significantly interacted with  
3 the TAL effectors (Fig. 6b), although the interactions were much weaker than those  
4 between the BED domain and the TAL effectors. In addition, the yeast two-hybrid  
5 experiments demonstrated direct interactions between OsERF101 and the TAL effectors  
6 (Fig. 6c). Thus, it is possible that the recognition of the TAL effectors by Xa1 is dependent  
7 upon interactions with OsERF101.

8

## 1 Discussion

2 Plants contain large numbers of NLR proteins. Some NLRs possess integrated  
3 decoy domains that are targeted by pathogen effectors. These integrated decoy domains  
4 mimic other effector targets whose binding to the effectors leads to disease development.  
5 Although BED was predicted to be an integrated decoy domain (Zuluaga *et al.*, 2017),  
6 direct evidence for this has not yet been obtained. Here, we showed that Xa1 forms  
7 complexes with the *Xoo* TAL effectors AvrXa7 and Xoo1132 via the BED domain,  
8 although direct interaction between the BED domain and the TAL effectors was not  
9 detected. We also found that the BED domain and the TAL effectors interact with the  
10 transcription factor OsERF101. Overexpression of *OsERF101* enhanced Xa1-mediated  
11 disease resistance, suggesting that OsERF101 plays a pivotal role in Xa1-mediated  
12 recognition of the TAL effectors and immune activation. Taken together, our results  
13 suggested that OsERF101 is a positive regulator in Xa1-mediated immunity.

14 On the other hand, we found that the *oserf101* knockout mutants also showed  
15 enhanced resistance to *Xoo* T7174. Interestingly, the HR lesions of the Kogyoku  
16 *oserf101* knockout mutants exhibited completely different characteristics from those of  
17 wild type and *OsERF101-OX* plants. Furthermore, the *OsERF101-OX* plants and the  
18 *oserf101* mutants influenced the transcription of largely different sets of downstream  
19 genes. This phenomenon suggests an additional Xa1-mediated immune pathway that is  
20 negatively regulated by OsERF101. Based upon these data, we propose a model for  
21 Xa1-OsERF101-mediated immune signaling by hypothesizing the existence of an “X  
22 factor” involved in Xa1-mediated immunity (Fig. 6d). In this model, both OsERF101 and  
23 the X factor positively regulate Xa1-mediated immunity, but OsERF101 has the ability to  
24 inhibit the activity of the X factor. Over-expression of OsERF101 enhances the Xa1-  
25 OsERF101-mediated immunity, but may suppress the X factor. The *oserf101* mutation  
26 results in enhancement of the X factor-mediated immune response. This model is  
27 consistent with two observations: 1) the enhanced resistance to *Xoo* T7174, induced by  
28 either the over-expression of *OsERF101* or the knockout of *OsERF101* in the Kogyoku  
29 background, is not observed with *Xoo* T7133, which carries an iTAL effector; 2) neither  
30 *OsERF101-OX* nor the *oserf101* mutation enhance *Xoo* T7174 resistance in the  
31 Nipponbare background, which does not carry Xa1. It should be noted here that *Xoo*  
32 T7174 also contains an iTAL effector named Tal3b, however, Tal3b is not functional in  
33 *Xoo* T7174 for unknown reasons (Ji *et al.*, 2016). We expect that the identification of the  
34 X factor will facilitate our understanding of Xa1-mediated immune signaling. Although we  
35 looked for rice genes up-regulated in the *oserf101* plants, we have not yet identified  
36 potential candidates for the X factor.

1           The *Xa1* alleles *Xa2*, *Xa14*, *Xa45*, and *Xo1* also encode BED-NLR proteins. The  
2 BED and NB domains are highly homologous among these *Xa1* allelic members.  
3 However, they are differentiated by the numbers of repeats in their C-terminal LRR  
4 regions (Ji *et al.*, 2020; Read *et al.*, 2020; Zhang *et al.*, 2020), and they confer different  
5 resistance spectra to races of *Xoo*. Since the immune responses mediated by these  
6 allelic members are suppressed by i<sub>TAL</sub> effectors (Ji *et al.*, 2020), it is likely that they  
7 all recognize the TAL effectors. The differences in the LRR regions suggest that the LRR  
8 domains may be the determinants of race specificity to *Xoo*. However, we observed only  
9 weak interactions between the LRR domain of *Xa1* and the two TAL effectors in the split  
10 NanoLuc luciferase complementation assays. Instead, our BiFC and split NanoLuc  
11 luciferase complementation assays suggested the formation of a complex involving a  
12 TAL effector, OsERF101, and the BED domain of *Xa1*. Therefore, it is possible that the  
13 differences among the LRR regions of the *Xa1* allelic members may affect either the  
14 formation of the tertiary complex or the LRR domain-mediated recognition of the tertiary  
15 complex.

16           The yeast two-hybrid experiments indicated that OsERF101 directly interacts  
17 with *Xa1* and the TAL effectors. In addition, OsERF101 regulates *Xa1*-dependent  
18 immunity, and we speculate that the putative X factor also regulates *Xa1*-dependent  
19 immunity. Host factors that are targeted by pathogen effectors and act as co-receptors  
20 with NLRs are referred to as sensing decoys (Paulus & van der Hoorn, 2018). Therefore,  
21 it is possible that OsERF101 and the X factor may be sensing decoys targeted by the  
22 TAL effectors, and that they function as co-receptors with *Xa1*. Since sensing decoys  
23 generally promote effector recognition in the presence of their cognate NLR proteins  
24 (Paulus & van der Hoorn, 2018), this scenario is consistent with the fact that the over-  
25 expression and knockout mutation of *OsERF101* enhanced *Xa1*-dependent immunity in  
26 the Kogyoku background, but not in the Nipponbare background. However, if OsERF101  
27 and the putative X factor function only as sensing decoys, the immune responses  
28 activated in the *OsERF101-OX* and *oserf101* plants should be same. The difference in  
29 the immune responses between the *OsERF101-OX* and *oserf101* plants imply that  
30 OsERF101 also contributes to the activation of *Xa1*-mediated immune signaling.

31           Consistent with recent reports (Read *et al.*, 2020; Xu *et al.*, 2021), we found that  
32 *Xa1* is localized in the nucleus. Our data indicated that the BED domain can confer  
33 nuclear localization. Thus, it is likely that *Xa1* recognizes the TAL effectors in the nucleus.  
34 In fact, the inhibition of *Xa1*-mediated immunity by the i<sub>TAL</sub> effectors requires the nuclear  
35 localization of the i<sub>TAL</sub> effectors (Ji *et al.*, 2016). These data strongly suggest that *Xa1*  
36 activates immune responses within the nucleus. Recent investigations using co-

1 immunoprecipitation indicated that the Xa1 allelic member Xo1 interacts with the iTAL  
2 effector Tal2h (Read *et al.*, 2020), although it is not yet known whether the interaction is  
3 direct or indirect. Although the molecular mechanisms of how the iTAL effectors inhibit  
4 Xa1-mediated immunity remain to be identified, it is possible that the iTAL effectors may  
5 suppress Xa1 through OsERF101 or the putative X factor.

6 It has been reported that the BED domains form a dimer (Zhang *et al.*, 2020).  
7 This suggests that oligomerization to form a resistosome may occur in BED NLRs, as  
8 occurs with other NLR proteins (Wang *et al.*, 2019; Ma *et al.*, 2020; Martin *et al.*, 2020).  
9 If interactions among the BED domain, OsERF101, and the TAL effectors alter the tertiary  
10 structure of the Xa1 protein, it is possible that this structural change may facilitate  
11 oligomerization through the BED domains. Recent structural studies of resistosomes  
12 using cryo-electron microscopy are beginning to reveal how NLR activates immunity  
13 (Wang *et al.*, 2019; Ma *et al.*, 2020; Martin *et al.*, 2020). Some NLRs with the N-terminal  
14 Toll-interleukin-1 receptor (TIR) domain have been reported to induce cell death through  
15 their nicotinamide adenine dinucleotide hydrolase activity (Horsefield *et al.*, 2019; Wan  
16 *et al.*, 2019). More recently, it was discovered that several NLRs with the N-terminal  
17 coiled coil domain function as plasma membrane-localized calcium-permeable channels  
18 (Bi *et al.*, 2021; Jacob *et al.*, 2021). However, the molecular mechanisms by which  
19 nuclear-localized NLRs activate immunity in plants are still unknown. This report on the  
20 interaction between Xa1 and OsERF101 in the initiation of the immune response  
21 provides new insight into NLR-mediated immunity.

## 22 23 **Acknowledgements**

24 We thank Drs. Seiji Tsuge and Bing Yang for valuable suggestions concerning TAL  
25 effectors, Masaki Endo for the CRISPR/Cas9 expression constructs, Ken-ichiro Taoka  
26 for the split NanoLuc Luciferase assay constructs, Tetsuya Nakazaki and Kazusa  
27 Nishimura for use of their greenhouse, and Nao Hayata, Maho Izumitani, Shunsuke Ando  
28 and Toshikazu Ohuchi for technical assistance. This research was supported by Grants-  
29 in-Aid for Scientific Research (A)(19H00945), for Scientific Research on Innovative  
30 Areas (18H04789), for Exploratory Research (20K21320), Strategic International  
31 Collaborative Research project promoted by the Ministry of Agriculture, Forestry and  
32 Fisheries, Tokyo, Japan (JPJ0088379) and Basic Science Research Projects from the  
33 Mitsubishi Foundation to T.K.; by Grants-in-Aid for Scientific Research (JP15K18649)  
34 and Basic Science Research Projects from the Sumitomo Foundation to K. Y.

## 35 36 **Author contributions**



1 SY and TK designed the research. AY, SY, SS, and KY performed the experiment. MS  
2 and AM analyzed RNAseq data. SY and TK wrote the manuscript. AY and SY contributed  
3 equally to this work.

#### 4 5 **References**

6 **Antony G, Zhou J, Huang S, Li T, Liu B, White F, Yang B. 2010.** Rice xa13 recessive  
7 resistance to bacterial blight is defeated by induction of the disease susceptibility  
8 gene Os-11N3. *The Plant Cell* **22**: 3864-3876.

9 **Bi G, Su M, Li N, Liang Y, Dang S, Xu J, Hu M, Wang J, Zou M, Deng Y, et al. 2021.**  
10 The ZAR1 resistosome is a calcium-permeable channel triggering plant immune  
11 signaling. *Cell* **184**: 3528-3541.

12 **Boch J, Scholze H, Schornack S, Landgraf A, Hahn S, Kay S, Lahaye T, Nickstadt  
13 A, Bonas U. 2009.** Breaking the code of DNA binding specificity of TAL-type III  
14 effectors. *Science* **326**: 1509-1512.

15 **Chen L, Hamada S, Fujiwara M, Zhu T, Thao NP, Wong HL, Krishna P, Ueda T, Kaku  
16 H, Shibuya N, et al. 2010.** The Hop/Sti1-Hsp90 chaperone complex facilitates  
17 the maturation and transport of a PAMP receptor in rice innate immunity. *Cell  
18 Host & Microbe* **7**: 185-196.

19 **Dangl JL, Horvath DM, Staskawicz BJ. 2013.** Pivoting the plant immune system from  
20 dissection to deployment. *Science* **341**: 746-751.

21 **Dou D, Zhou JM. 2012.** Phytopathogen effectors subverting host immunity: different  
22 foes, similar battleground. *Cell Host & Microbe* **12**: 484-495.

23 **Hiei Y, Ohta S, Komari T, Kumashiro T. 1994.** Efficient transformation of rice (*Oryza  
24 sativa* L.) mediated by *Agrobacterium* and sequence analysis of the boundaries  
25 of the T-DNA. *The Plant J* **6**: 271-282.

26 **Horsefield S, Burdett H, Zhang X, Manik MK, Shi Y, Chen J, Qi T, Gilley J, Lai JS,  
27 Rank MX, et al. 2019.** NAD(+) cleavage activity by animal and plant TIR domains  
28 in cell death pathways. *Science* **365**: 793-799.

29 **Ishikawa K, Yamaguchi K, Sakamoto K, Yoshimura S, Inoue K, Tsuge S, Kojima C,  
30 Kawasaki T. 2014.** Bacterial effector modulation of host E3 ligase activity  
31 suppresses PAMP-triggered immunity in rice. *Nature Communications* **5**: 5430.

32 **Jacob P, Kim NH, Wu F, El-Kasmi F, Chi Y, Walton WG, Furzer OJ, Lietzan AD, Sunil  
33 S, Kempthorn K, et al. 2021.** Plant "helper" immune receptors are Ca<sup>2+</sup>-  
34 permeable nonselective cation channels. *Science* **373**: 420-425.

35 **Ji C, Ji Z, Liu B, Cheng H, Liu B, Liu S, Yang B, Chen G. 2020.** Xa1 allelic R genes  
36 activate rice blight resistance suppressed by interfering TAL effectors. *Plant*

- 1            *Communications* **1**: 100087.
- 2    **Ji Z, Ji C, Liu B, Zou L, Chen G, Yang B. 2016.** Interfering TAL effectors of  
3            *Xanthomonas oryzae* neutralize R-gene-mediated plant disease resistance.  
4            *Nature Communications* **7**: 13435.
- 5    **Jin Y, Pan W, Zheng X, Cheng X, Liu M, Ma H, Ge X. 2018.** OsERF101, an ERF family  
6            transcription factor, regulates drought stress response in reproductive tissues.  
7            *Plant Molecular Biology* **98**: 51-65.
- 8    **Jones JD, Vance RE, Dangl JL. 2016.** Intracellular innate immune surveillance devices  
9            in plants and animals. *Science* **354**; aaf6395.
- 10   **Kim D, Langmead B, Salzberg SL. 2015.** HISAT: a fast spliced aligner with low memory  
11            requirements. *Nature Methods* **12**: 357-360.
- 12   **Liao Y, Smyth GK, Shi W. 2014.** featureCounts: an efficient general purpose program  
13            for assigning sequence reads to genomic features. *Bioinformatics* **30**: 923-930.
- 14   **Lim C, Kang K, Shim Y, Sakuraba Y, An G, Paek NC. 2020.** Rice ETHYLENE  
15            RESPONSE FACTOR 101 promotes leaf senescence through Jasmonic acid-  
16            mediated regulation of OsNAP and OsMYC2. *Frontiers in Plant Science* **11**: 1096.
- 17   **Lo CC, Chain PS. 2014.** Rapid evaluation and quality control of next generation  
18            sequencing data with FaQCs. *BMC Bioinformatics* **15**: 366.
- 19   **Ma S, Lapin D, Liu L, Sun Y, Song W, Zhang X, Logemann E, Yu D, Wang J,**  
20            **Jirschitzka J, et al. 2020.** Direct pathogen-induced assembly of an NLR immune  
21            receptor complex to form a holoenzyme. *Science* **370**: eable3069..
- 22   **Martin R, Qi T, Zhang H, Liu F, King M, Toth C, Nogales E, Staskawicz BJ. 2020.**  
23            Structure of the activated ROQ1 resistosome directly recognizing the pathogen  
24            effector XopQ. *Science* **370**: eabd9993.
- 25   **Mikami M, Toki S, Endo M. 2015.** Comparison of CRISPR/Cas9 expression constructs  
26            for efficient targeted mutagenesis in rice. *Plant Molecular Biology* **88**: 561-572.
- 27   **Moscou MJ, Bogdanove AJ. 2009.** A simple cipher governs DNA recognition by TAL  
28            effectors. *Science* **326**: 1501.
- 29   **Nakagawa T, Kurose T, Hino T, Tanaka K, Kawamukai M, Niwa Y, Toyooka K,**  
30            **Matsuoka K, Jinbo T, Kimura T. 2007.** Development of series of gateway binary  
31            vectors, pGWBs, for realizing efficient construction of fusion genes for plant  
32            transformation. *Journal of Bioscience and Bioengineering* **104**: 34-41.
- 33   **Nakano T, Suzuki K, Fujimura T, Shinshi H. 2006.** Genome-wide analysis of the ERF  
34            gene family in Arabidopsis and rice. *Plant Physiology* **140**: 411-432.
- 35   **Naseem M, Kunz M, Dandekar T. 2017.** Plant-pathogen maneuvering over apoplastic  
36            sugars. *Trends in Plant Science* **22**: 740-743.

- 1 **Ochiai H, Inoue Y, Takeya M, Sasaki A, Kaku H. 2005.** Genome sequence of  
2 *Xanthomonas oryzae* pv. *oryzae* suggests contribution of large numbers of  
3 effector genes and insertion sequences to its race diversity. *Japan Agricultural*  
4 *Research Quarterly* **39**: 275-287.
- 5 **Ogawa T, Morinaka T, Fujii K, Kimura T. 1978.** Inheritance of resistance of rice varieties  
6 Kogyoku and Java 14 to bacterial group V of *Xanthomonas oryzae*. *Annals of*  
7 *Phytopathological Society of Japan* **44**: 137-141.
- 8 **Oliva R, Ji C, Atienza-Grande G, Hugueta-Tapia JC, Perez-Quintero A, Li T, Eom JS,**  
9 **Li C, Nguyen H, Liu B, et al. 2019.** Broad-spectrum resistance to bacterial blight  
10 in rice using genome editing. *Nature Biotechnology* **37**: 1344-1350.
- 11 **Paulus JK, van der Hoorn RAL. 2018.** Tricked or trapped-Two decoy mechanisms in  
12 host-pathogen interactions. *PLoS Pathogens* **14**: e1006761.
- 13 **Read AC, Moscou MJ, Zimin AV, Perteua G, Meyer RS, Purugganan MD, Leach JE,**  
14 **Triplett LR, Salzberg SL, Bogdanove AJ. 2020.** Genome assembly and  
15 characterization of a complex zfBED-NLR gene-containing disease resistance  
16 locus in Carolina Gold Select rice with Nanopore sequencing. *PLoS Genetics* **16**:  
17 e1008571.
- 18 **Read AC, Rinaldi FC, Hutin M, He YQ, Triplett LR, Bogdanove AJ. 2016.** Suppression  
19 of Xo1-Mediated Disease Resistance in Rice by a Truncated, Non-DNA-Binding  
20 TAL Effector of *Xanthomonas oryzae*. *Frontiers in Plant Science* **7**: 1516.
- 21 **Sun J, Nishiyama T, Shimizu K, Kadota K. 2013.** TCC: an R package for comparing  
22 tag count data with robust normalization strategies. *BMC Bioinformatics* **14**: 219.
- 23 **Taoka KI, Shimatani Z, Yamaguchi K, Ogawa M, Saitoh H, Ikeda Y, Akashi H, Terada**  
24 **R, Kawasaki T, Tsuji H. 2021.** Novel assays to monitor gene expression and  
25 protein-protein interactions in rice using the bioluminescent protein, NanoLuc.  
26 *Plant Biotechnology* **38**: 89-99.
- 27 **Wamaitha MJ, Yamamoto R, Wong HL, Kawasaki T, Kawano Y, Shimamoto K. 2012.**  
28 OsRap2.6 transcription factor contributes to rice innate immunity through its  
29 interaction with Receptor for Activated Kinase-C 1 (RACK1). *Rice (N Y)* **5**: 35.
- 30 **Wan L, Essuman K, Anderson RG, Sasaki Y, Monteiro F, Chung EH, Osborne**  
31 **Nishimura E, DiAntonio A, Milbrandt J, Dangl JL, et al. 2019.** TIR domains of  
32 plant immune receptors are NAD(+)-cleaving enzymes that promote cell death.  
33 *Science* **365**: 799-803.
- 34 **Wang J, Hu M, Wang J, Qi J, Han Z, Wang G, Qi Y, Wang HW, Zhou JM, Chai J. 2019.**  
35 Reconstitution and structure of a plant NLR resistosome conferring immunity.  
36 *Science* **364**: eaav5870.

- 1 **Xu X, Xu Z, Ma W, Haq F, Li Y, Shah SMA, Zhu B, Zhu C, Zou L, Chen G. 2021.** TALE-  
2 triggered and iTALE-suppressed Xa1 resistance to bacterial blight is independent  
3 of OsTFIIA $\gamma$ 1 or OsTFIIA $\gamma$ 5 in rice. *Journal of Experimental Botany* **72**: 3249-  
4 3262.
- 5 **Yamaguchi K, Yamada K, Ishikawa K, Yoshimura S, Hayashi N, Uchihashi K,**  
6 **Ishihama N, Kishi-Kaboshi M, Takahashi A, Tsuge S, et al. 2013.** A receptor-  
7 like cytoplasmic kinase targeted by a plant pathogen effector is directly  
8 phosphorylated by the chitin receptor and mediates rice immunity. *Cell Host &*  
9 *Microbe* **13**: 347-357.
- 10 **Yoshihisa A, Yoshimura S, Shimizu M, Yamaguchi K, Kawasaki T. 2021.** Identification  
11 of TAL and iTAL effectors in the Japanese strain T7133 of *Xanthomonas oryzae*  
12 *pv. oryzae*. *Journal of General Plant Pathology* [https://doi.org/10.1007/s10327-](https://doi.org/10.1007/s10327-021-01023-8)  
13 [021-01023-8](https://doi.org/10.1007/s10327-021-01023-8).
- 14 **Yoshimura S, Yamanouchi U, Katayose Y, Toki S, Wang ZX, Kono I, Kurata N, Yano**  
15 **M, Iwata N, Sasaki T. 1998.** Expression of Xa1, a bacterial blight-resistance gene  
16 in rice, is induced by bacterial inoculation. *Proceedings of National Academy of*  
17 *Science, USA* **95**: 1663-1668.
- 18 **Zhang B, Zhang H, Li F, Quyang Y, Yuan M, Li X, Xiao J, Wang S. 2020.** Multiple  
19 alleles encoding atypical NLRs with unique central tandem repeats in rice confer  
20 resistance to *Xanthomonas oryzae pv. oryzae*. *Plant Communications* **1**: 100088.
- 21 **Zuluaga P, Szurek B, Koebnik R, Kroj T, Morel JB. 2017.** Effector mimics and  
22 integrated decoys, the never-ending arms race between Rice and *Xanthomonas*  
23 *oryzae*. *Frontiers in Plant Science* **8**: 431.
- 24  
25

1 **Figure legends**

2 **Fig. 1** Subcellular localization of Xa1, AvrXa7, and Xoo1132

3 (a) Schematic structures of full-length Xa1<sup>1-1,802</sup> and four truncated Xa1 fragments: Xa1<sup>1-</sup>  
4 <sup>325</sup> (1–325 aa), Xa1<sup>1-1,012</sup> (1–1,012 aa), Xa1<sup>312-1,012</sup> (312–1,012 aa), and Xa1<sup>1,008-1,802</sup>  
5 (1,008–1,802 aa). Numbers above the boxes indicate amino-acid residues. (b)  
6 Subcellular localization of the GFP-fused full length Xa1 and truncated Xa1 fragments in  
7 rice protoplasts. Fluorescence was observed 18 h after transformation. Scale bar, 10  $\mu$ m.  
8 NLS-mCherry was used as a nuclear localization marker. (c) Proportions of cells showing  
9 nuclear and/or cytoplasmic localization of the Xa1 fragments. Blue and grey boxes  
10 indicate nuclear and cytoplasmic localization, respectively. Orange boxes indicate the  
11 cells in which fluorescence was detected in both the nuclei and cytoplasm. (d) Schematic  
12 structures of AvrXa7, Xoo1132, and two truncated Xoo1132 fragments. N, N-terminal  
13 region; CRR, central repeat region; C, C-terminal region. (e) Subcellular localization of  
14 the GFP-fused AvrXa7 and Xoo1132 and truncated Xoo1132 fragments in rice  
15 protoplasts. Fluorescence was observed 18 h after transformation. Scale bar, 10  $\mu$ m.  
16 NLS-mCherry was used as a nuclear localization marker.

17

18 **Fig. 2** Xa1 interacts with AvrXa7 and Xoo1132

19 (a) Bimolecular fluorescence complementation (BiFC) analysis was used to visualize the  
20 interaction between the Xa1 fragments and the TAL effectors in rice protoplasts. NLS-  
21 mCherry was used as a nuclear localization marker. (b) Quantification of the interaction  
22 between the Xa1 fragments and Xoo1132. Split NanoLuc luciferase complementation  
23 assays were carried out by transient expression of SmBiT-fused Xoo1132 and LgBiT-  
24 fused Xa1 fragments. Values are means  $\pm$  S.E. Different letters on the right sides of the  
25 data points indicate significant differences ( $p < 0.01$ ). (c) Quantification of the interaction  
26 between the Xa1 fragments and AvrXa7. Split NanoLuc luciferase complementation  
27 assays were carried out by transient expression of SmBiT-fused AvrXa7 and LgBiT-fused  
28 Xa1 fragments. Values are means  $\pm$  S.E. Different letters on the right sides of the data  
29 points indicate significant differences ( $p < 0.01$ ).

30

31 **Fig. 3** OsERF101 interacts with the BED domain of Xa1

32 (a) Interaction between the Xa1 fragments and OsERF101 in yeast two-hybrid  
33 experiments. Growth of yeast colonies on –UWLH plates indicates a positive interaction.  
34 (b) Subcellular localization of GFP-fused OsERF101 in rice protoplasts. Fluorescence  
35 was observed 18 h after transformation. Scale bar, 10  $\mu$ m. NLS- mCherry was used as  
36 a nuclear localization marker. (c) Bimolecular fluorescence complementation (BiFC)

1 analysis was used to visualize the interaction between the Xa1 BED domain and  
2 OsERF101 in rice protoplasts. NLS- mCherry was used as a nuclear localization marker.  
3 GUS was used as a negative control. Scale bar, 10  $\mu$ m. (d) Split NanoLuc luciferase  
4 complementation assays for quantification of the interaction between the Xa1 fragments  
5 and OsERF101. SmBiT-fused OsERF101 and LgBiT-fused Xa1 fragments were  
6 transiently expressed in rice protoplasts, and the luciferase activities were measured.  
7 Values are means  $\pm$  S.E. Asterisks on the right sides of the data points indicate significant  
8 differences (\*;  $p < 0.05$ ; \*\*,  $p < 0.01$ ).

9  
10 **Fig. 4** *OsERF101-OX* and *oserf101* enhance bacterial blight resistance in the Kogyoku  
11 background.

12 (a) Hypersensitive response of the *OsERF101-OX* and *oserf101* plants in the Kogyoku  
13 background. The suspensions of *Xoo* T7174 or *Xoo* T7133 were injected into the leaves  
14 of three-week-old seedlings. Photos were taken at 4 days after inoculation (DAI). (b) The  
15 bacterial populations of *Xoo* T7174 in the *OsERF101-OX* and *oserf101* plants were  
16 analyzed by quantitative real-time PCR. The data indicate the DNA levels of the *X.*  
17 *oryzae XopA* gene relative to that of the rice *ubiquitin* gene. Values are means  $\pm$  S.E.  
18 Different letters above the data points of 4 DAI indicate significant differences ( $p < 0.01$ ).  
19 (c) Expression of *SWEET14* in the *OsERF101-OX* and *oserf101* plants after infection  
20 with *Xoo* T7174. The transcript levels were measured by quantitative real-time PCR.  
21 Values are means  $\pm$  S.E. Different letters above the data points of 4 DAI indicate  
22 significant differences ( $p < 0.01$ ).

23  
24 **Fig. 5** Enhanced resistance of the *OsERF101-OX* and *oserf101* plants depends on Xa1.

25 (a) The bacterial populations of *Xoo* T7133 in the *OsERF101-OX* and *oserf101* plants in  
26 the Kogyoku background were analyzed by quantitative real-time PCR. The data indicate  
27 the DNA levels of the *X. oryzae XopA* gene relative to that of the rice *ubiquitin* gene.  
28 Values are means  $\pm$  S.E. Different letters above the data points of 4 DAI indicate  
29 significant differences ( $p < 0.01$ ). (b) Expression of *SWEET14* in the *OsERF101-OX* and  
30 *oserf101* plants after infection with *Xoo* T7133. The transcript levels were measured by  
31 quantitative real-time PCR. Values are means  $\pm$  S.E. Different letters above the data  
32 points of 4 DAI indicate significant differences ( $p < 0.01$ ). (c) Disease symptoms of the  
33 *OsERF101-OX* and *oserf101* plants in the Nipponbare background. The suspension of  
34 *Xoo* T7174 was injected into the leaves of three-week-old seedlings. Photos were taken  
35 at 4 DAI. (d) The bacterial populations of *Xoo* T7174 in the *OsERF101-OX* and *oserf101*  
36 plants in the Nipponbare background were analyzed by quantitative real-time PCR. The

1 data indicate the DNA levels of the *X. oryzae XopA* gene relative to that of the rice  
2 *ubiquitin* gene. Values are means  $\pm$  S.E. Different letters above the data points of 4 DAI  
3 indicate significant differences ( $p < 0.01$ ). (e) Expression of *SWEET14* in the *OsERF101*-  
4 OX and *oserf101* plants in the Nipponbare background after infection with *Xoo* T7174.  
5 The transcript levels were measured by quantitative real-time PCR. Values are means  $\pm$   
6 S.E. Different letters above the data points of 4 DAI indicate significant differences ( $p <$   
7 0.01).

8

9 **Fig. 6** *OsERF101*-OX and *oserf101* plants activate different Xa1-mediated immunity  
10 pathways.

11 (a) Comparative analysis of transcriptomes in wild-type, *OsERF101*-OX, and *oserf101*  
12 plants. RNA-seq analysis was carried out using leaves at 2 DAI with *Xoo* T7174. (b) Split  
13 NanoLuc luciferase complementation assays for quantification of the interaction between  
14 *OsERF101* and the TAL effectors. SmBiT-fused *AvrXa7* or *Xoo1132* and LgBiT-fused  
15 *ERF101* were transiently expressed in rice protoplasts, and the luciferase activities were  
16 measured. Values are means  $\pm$  S.E. Asterisks on the right sides of the data points  
17 indicate significant differences (\*,  $p < 0.05$ ; \*\*,  $p < 0.01$ ). (c) Interaction between  
18 *OsERF101* and TAL effectors in yeast two-hybrid experiments. Growth of yeast colonies  
19 on -UWLH plates indicates a positive interaction. (d) Proposed model for *OsERF101*-  
20 mediated immunity. *OsERF101* interacts with Xa1, and positively regulates Xa1-  
21 mediated immunity. *OsERF101* may negatively regulate a putative Factor X, which  
22 functions as a positive regulator of Xa1-mediated immunity. Depletion of *OsERF101* may  
23 lead to enhance Factor X-mediated immunity.

24

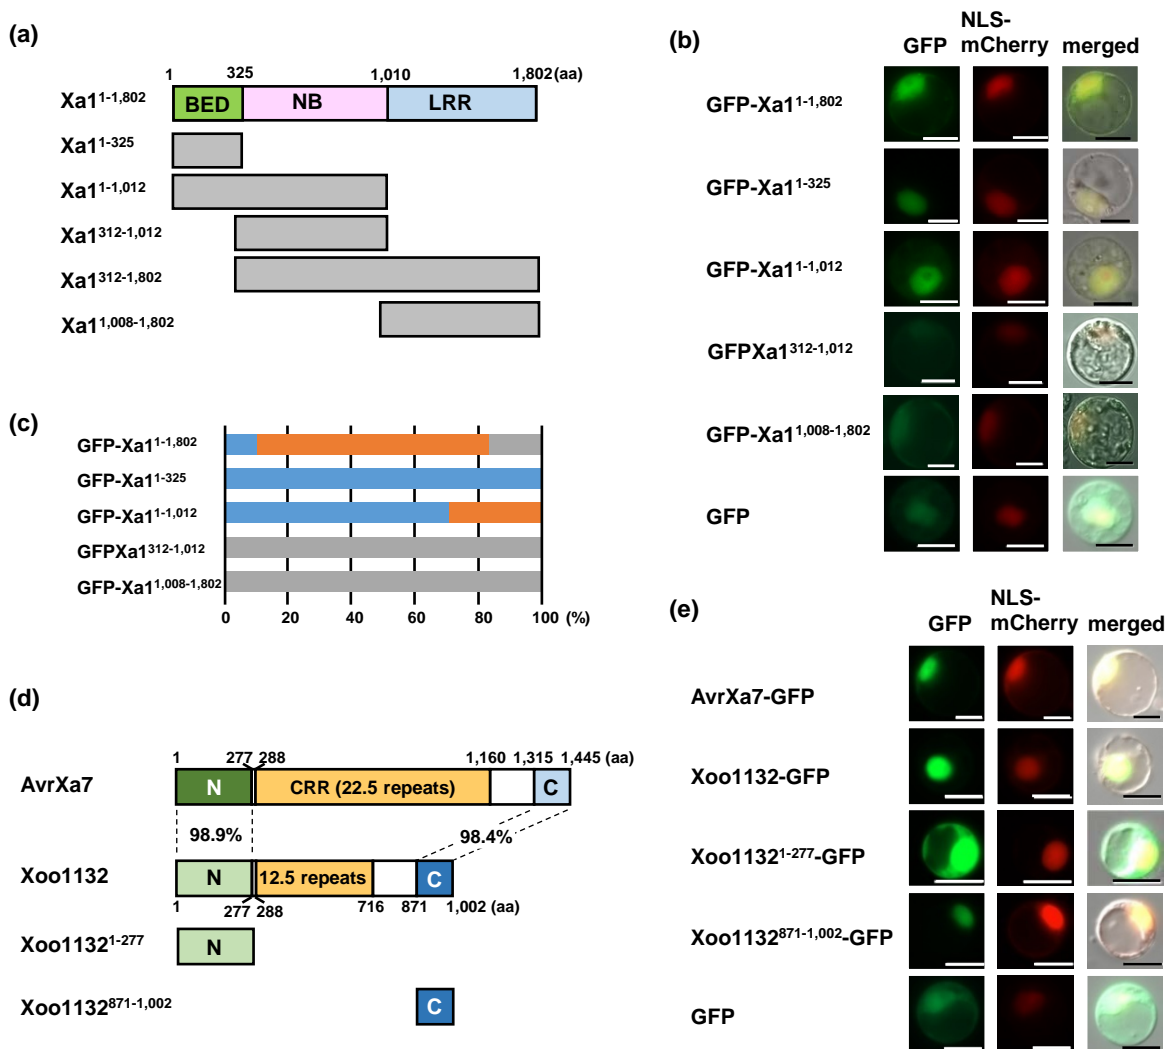

**Fig. 1 Subcellular localization of Xa1, AvrXa7, and Xoo1132**

(a) Schematic structures of full-length Xa1<sup>1-1,802</sup> and four truncated Xa1 fragments: Xa1<sup>1-325</sup> (1–325 aa), Xa1<sup>1-1,012</sup> (1–1,012 aa), Xa1<sup>312-1,012</sup> (312–1,012 aa), and Xa1<sup>1,008-1,802</sup> (1,008–1,802 aa). Numbers above the boxes indicate amino-acid residues. (b) Subcellular localization of the GFP-fused full length Xa1 and truncated Xa1 fragments in rice protoplasts. Fluorescence was observed 18 h after transformation. Scale bar, 10 μm. NLS-mCherry was used as a nuclear localization marker. (c) Proportions of cells showing nuclear and/or cytoplasmic localization of the Xa1 fragments. Blue and grey boxes indicate nuclear and cytoplasmic localization, respectively. Orange boxes indicate the cells in which fluorescence was detected in both the nuclei and cytoplasm. (d) Schematic structures of AvrXa7, Xoo1132, and two truncated Xoo1132 fragments. N, N-terminal region; CRR, central repeat region; C, C-terminal region. (e) Subcellular localization of the GFP-fused AvrXa7 and Xoo1132 and truncated Xoo1132 fragments in rice protoplasts. Fluorescence was observed 18 h after transformation. Scale bar, 10 μm. NLS-mCherry was used as a nuclear localization marker.



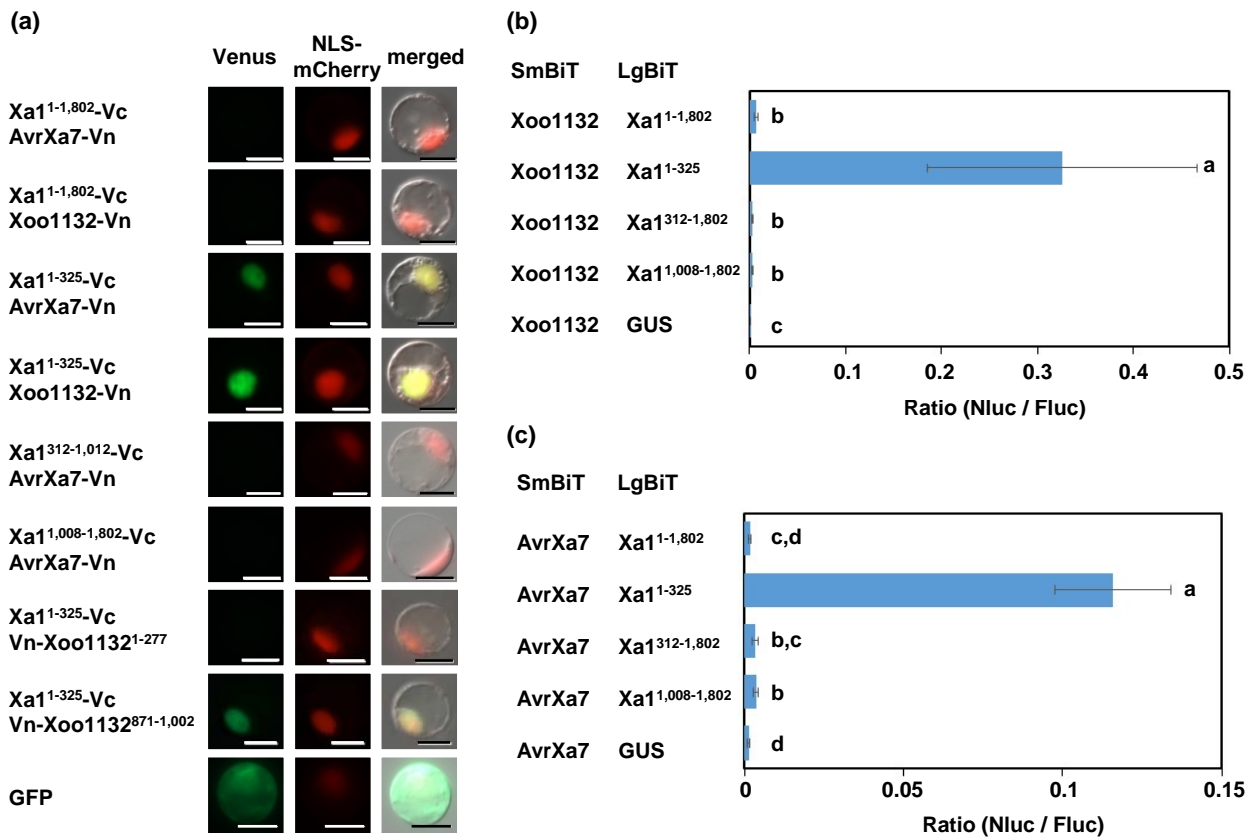

**Fig. 2 Xa1 interacts with AvrXa7 and Xoo1132**

(a) Bimolecular fluorescence complementation (BiFC) analysis was used to visualize the interaction between the Xa1 fragments and the TAL effectors in rice protoplasts. NLS-mCherry was used as a nuclear localization marker. (b) Quantification of the interaction between the Xa1 fragments and Xoo1132. Split NanoLuc luciferase complementation assays were carried out by transient expression of SmBiT-fused Xoo1132 and LgBiT-fused Xa1 fragments. Values are means  $\pm$  S.E. Different letters on the right sides of the data points indicate significant differences ( $p < 0.01$ ). (c) Quantification of the interaction between the Xa1 fragments and AvrXa7. Split NanoLuc luciferase complementation assays were carried out by transient expression of SmBiT-fused AvrXa7 and LgBiT-fused Xa1 fragments. Values are means  $\pm$  S.E. Different letters on the right sides of the data points indicate significant differences ( $p < 0.01$ ).

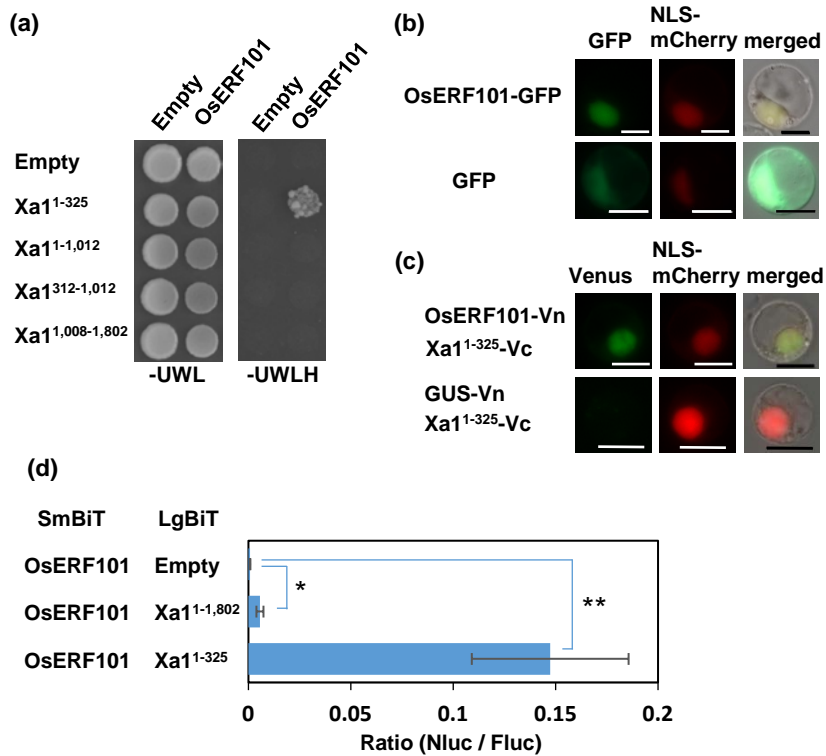

**Fig. 3 OsERF101 interacts with the BED domain of Xa1**

(a) Interaction between the Xa1 fragments and OsERF101 in yeast two-hybrid experiments. Growth of yeast colonies on –UWLH plates indicates a positive interaction. (b) Subcellular localization of GFP-fused OsERF101 in rice protoplasts. Fluorescence was observed 18 h after transformation. Scale bar, 10  $\mu$ m. NLS- mCherry was used as a nuclear localization marker. (c) Bimolecular fluorescence complementation (BiFC) analysis was used to visualize the interaction between the Xa1 BED domain and OsERF101 in rice protoplasts. NLS- mCherry was used as a nuclear localization marker. GUS was used as a negative control. Scale bar, 10  $\mu$ m. (d) Split NanoLuc luciferase complementation assays for quantification of the interaction between the Xa1 fragments and OsERF101. SmBiT-fused OsERF101 and LgBiT-fused Xa1 fragments were transiently expressed in rice protoplasts, and the luciferase activities were measured. Values are means  $\pm$  S.E. Asterisks on the right sides of the data points indicate significant differences (\*;  $p < 0.05$ ; \*\*,  $p < 0.01$ ).

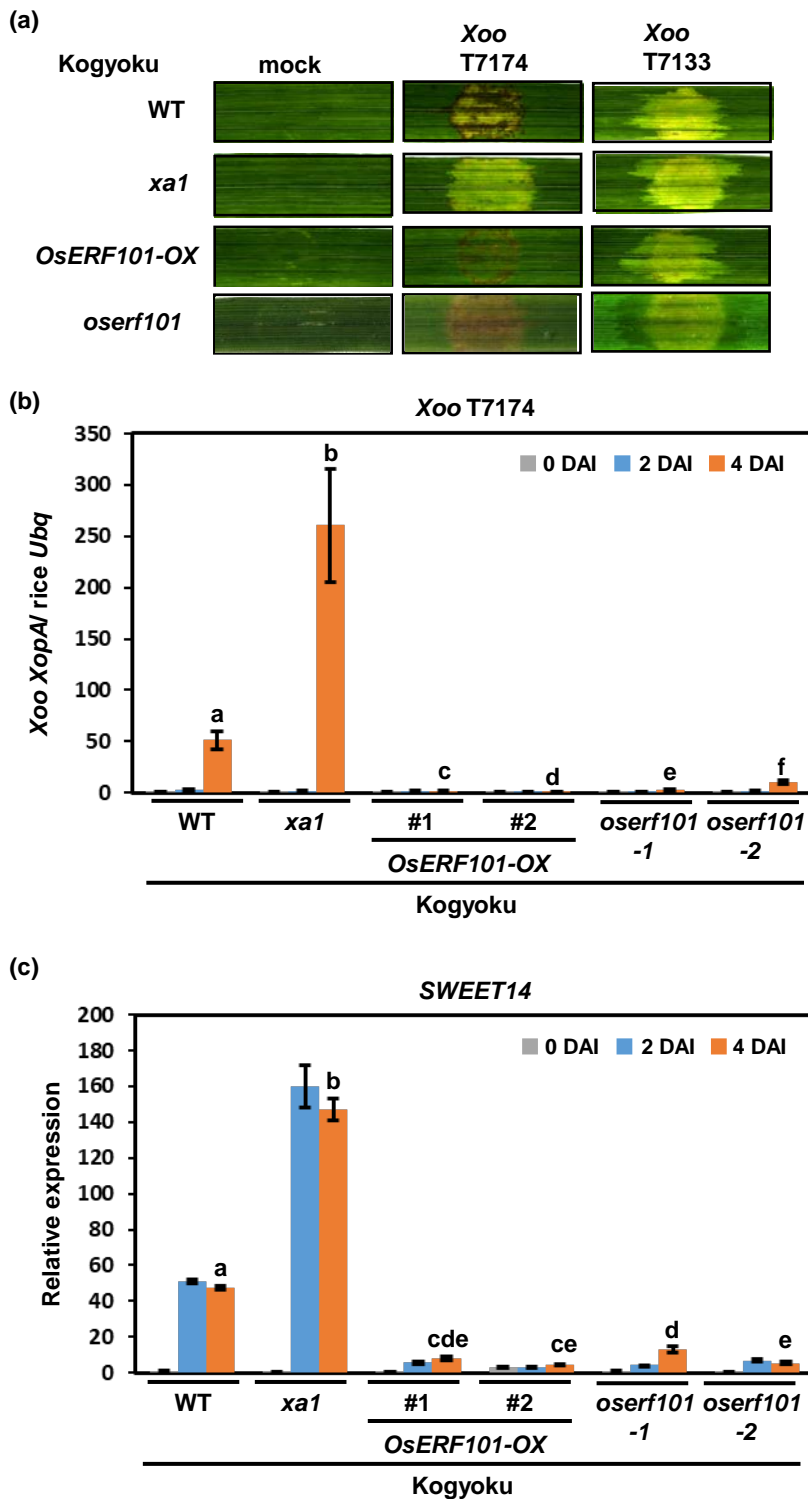

**Fig. 4 *OsERF101-OX* and *oserf101* enhance bacterial blight resistance in the Kogyoku background.**

(a) Hypersensitive response of the *OsERF101-OX* and *oserf101* plants in the Kogyoku background. The suspensions of *Xoo* T7174 or *Xoo* T7133 were injected into the leaves of three-week-old seedlings. Photos were taken at 4 days after inoculation (DAI). (b) The bacterial populations of *Xoo* T7174 in the *OsERF101-OX* and *oserf101* plants were analyzed by quantitative real-time PCR. The data indicate the DNA levels of the *X. oryzae* *XopA* gene relative to that of the rice *ubiquitin* gene. Values are means  $\pm$  S.E. Different letters above the data points of 4 DAI indicate significant differences ( $p < 0.01$ ). (c) Expression of *SWEET14* in the *OsERF101-OX* and *oserf101* plants after infection with *Xoo* T7174. The transcript levels were measured by quantitative real-time PCR. Values are means  $\pm$  S.E. Different letters above the data points of 4 DAI indicate significant differences ( $p < 0.01$ ).

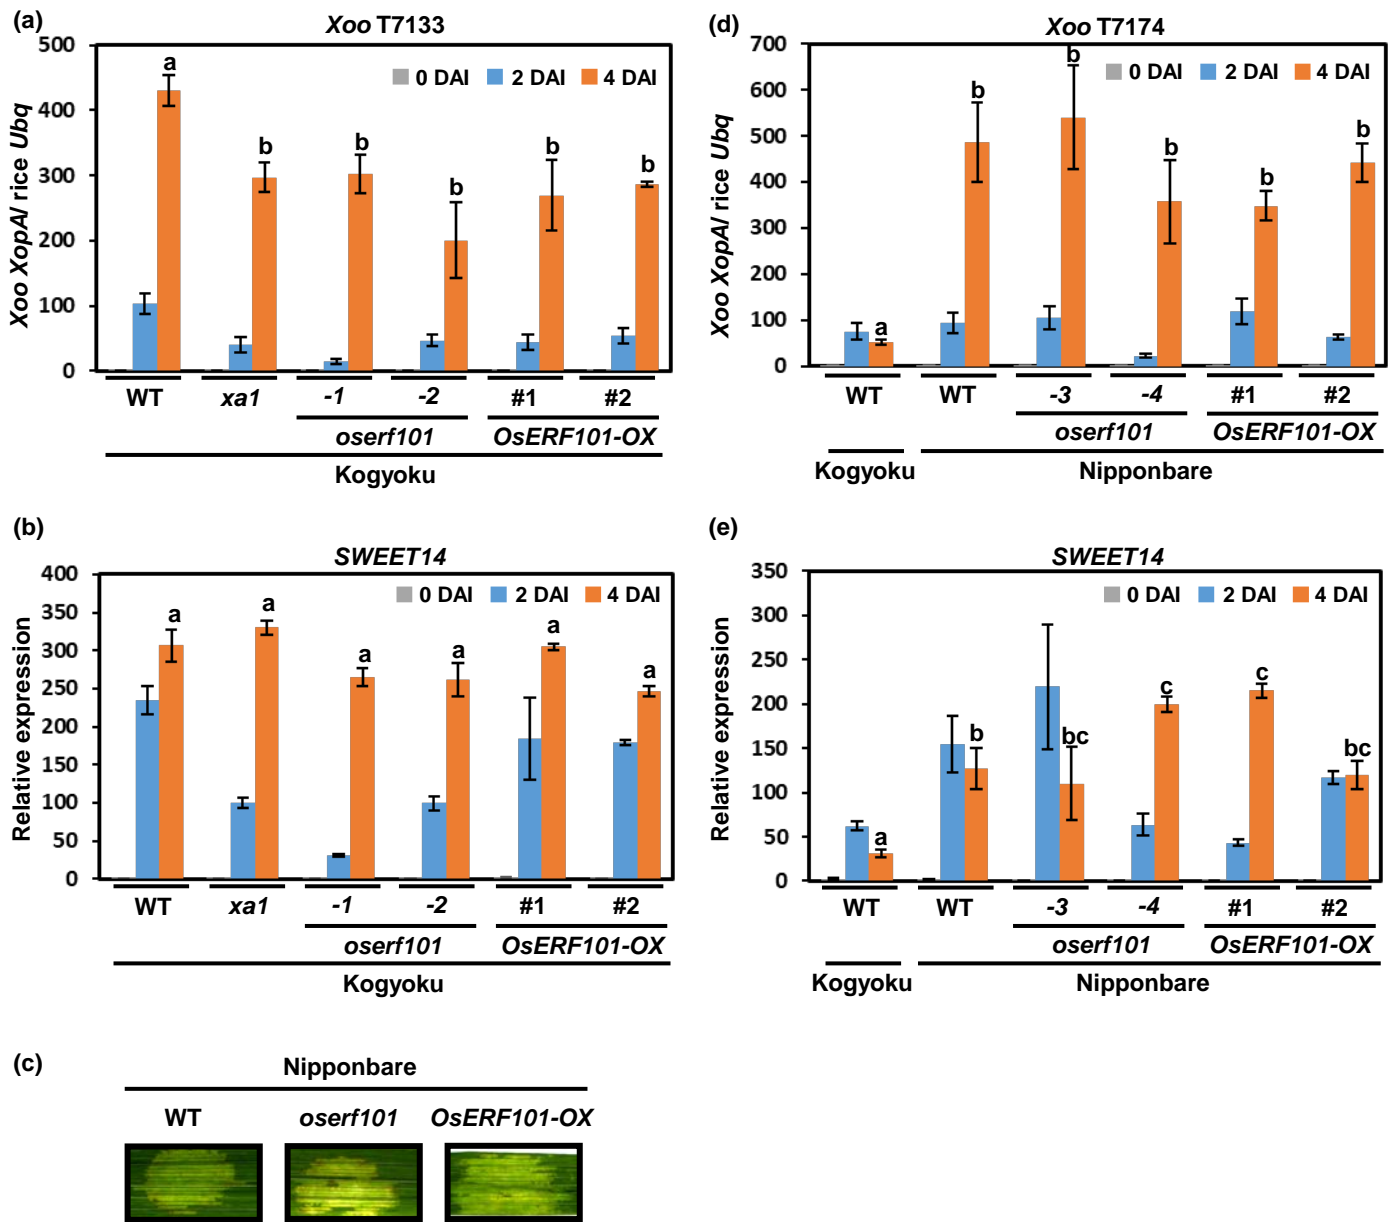

**Fig. 5 Enhanced resistance of the *OsERF101-OX* and *oserf101* plants depends on *Xa1*.**

(a) The bacterial populations of *Xoo* T7133 in the *OsERF101-OX* and *oserf101* plants in the Kogyoku background were analyzed by quantitative real-time PCR. The data indicate the DNA levels of the *X. oryzae XopA* gene relative to that of the rice *ubiquitin* gene. Values are means  $\pm$  S.E. Different letters above the data points of 4 DAI indicate significant differences ( $p < 0.01$ ). (b) Expression of *SWEET14* in the *OsERF101-OX* and *oserf101* plants after infection with *Xoo* T7133. The transcript levels were measured by quantitative real-time PCR. Values are means  $\pm$  S.E. Different letters above the data points of 4 DAI indicate significant differences ( $p < 0.01$ ). (c) Disease symptoms of the *OsERF101-OX* and *oserf101* plants in the Nipponbare background. The suspension of *Xoo* T7174 was injected into the leaves of three-week-old seedlings. Photos were taken at 4 DAI. (d) The bacterial populations of *Xoo* T7174 in the *OsERF101-OX* and *oserf101* plants in the Nipponbare background were analyzed by quantitative real-time PCR. The data indicate the DNA levels of the *X. oryzae XopA* gene relative to that of the rice *ubiquitin* gene. Values are means  $\pm$  S.E. Different letters above the data points of 4 DAI indicate significant differences ( $p < 0.01$ ). (e) Expression of *SWEET14* in the *OsERF101-OX* and *oserf101* plants in the Nipponbare background after infection with *Xoo* T7174. The transcript levels were measured by quantitative real-time PCR. Values are means  $\pm$  S.E. Different letters above the data points of 4 DAI indicate significant differences ( $p < 0.01$ ).

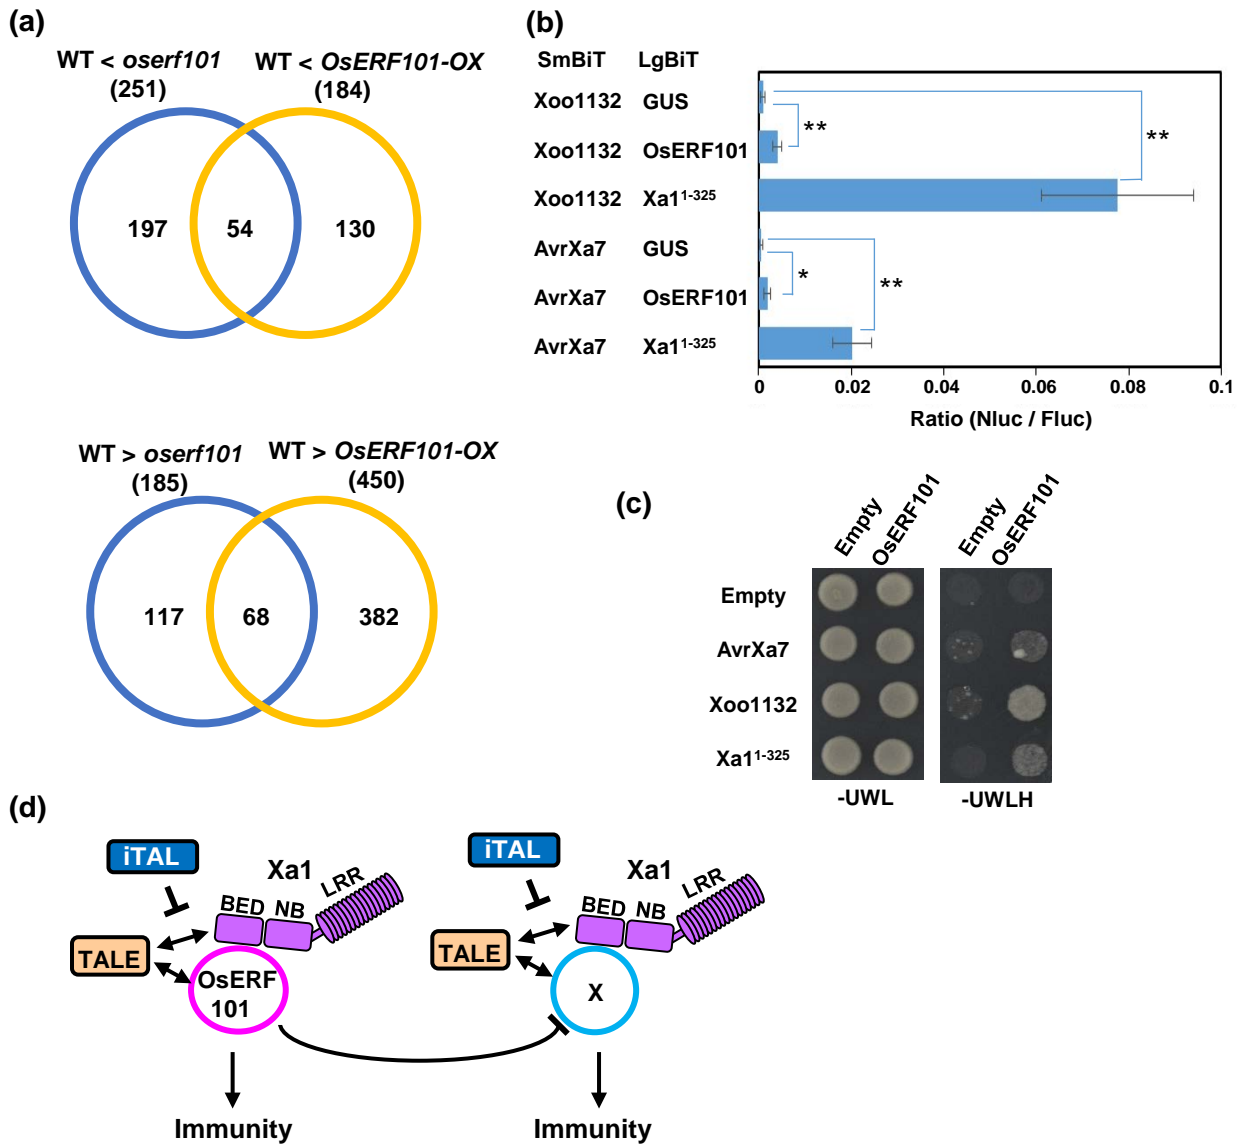

**Fig. 6 *OsERF101-OX* and *oserf101* plants activate different *Xa1*-mediated immunity pathways.**

(a) Comparative analysis of transcriptomes in wild-type, *OsERF101-OX*, and *oserf101* plants. RNA-seq analysis was carried out using leaves at 2 DAI with *Xoo* T7174. (b) Split NanoLuc luciferase complementation assays for quantification of the interaction between *OsERF101* and the TAL effectors. SmBiT-fused AvrXa7 or Xoo1132 and LgBiT-fused ERF101 were transiently expressed in rice protoplasts, and the luciferase activities were measured. Values are means  $\pm$  S.E. Asterisks on the right sides of the data points indicate significant differences (\*,  $p < 0.05$ ; \*\*,  $p < 0.01$ ). (c) Interaction between *OsERF101* and TAL effectors in yeast two-hybrid experiments. Growth of yeast colonies on -UWLH plates indicates a positive interaction. (d) Proposed model for *OsERF101*-mediated immunity. *OsERF101* interacts with *Xa1*, and positively regulates *Xa1*-mediated immunity. *OsERF101* may negatively regulate a putative Factor X, which functions as a positive regulator of *Xa1*-mediated immunity. Depletion of *OsERF101* may lead to enhance Factor X-mediated immunity.

## N-terminal region

|           |     |                                                              |     |
|-----------|-----|--------------------------------------------------------------|-----|
| AvrXa7_N  | 1   | MDPIRSRTFSPARELLPGQFDRVQFTADRGGAPPAGGFLDGLPARRTMSRTRLPSPPAF  | 60  |
| Xoo1132_N | 1   | MDPIRSRTFSPARELLPGQFDRVQFTADRGGAPPAGGFLDGLPARRTMSRTRLPSPPAF  | 60  |
|           | 61  | SPAFSAGSFSDFLRQFDPSLLDTSLLDSMPAVGTPHTAAAPAECEDEVQSGLRAADDPPT | 120 |
|           | 61  | SPAFSAGSFSDFLRQFDPSLLDTSLLDSMPAVGTPHTAAAPAECEDEVQSGLRAADDPPT | 120 |
|           | 121 | VRVAVTAARPPRAKPAPRRRAAQPSDASPAQVDLRTLGYSSQQQEEKPKPKVRSTVAQHH | 180 |
|           | 121 | VRVAVTAARPPRAKPAPRRRAAQPSDASPAQVDLRTLGYSSQQQEEKPKPKVRSTVAQHH | 180 |
|           | 181 | EALVGHGFTHAHIVALSQHPAALGTVAVTYQDIIRALPEATHEDIVGVGKQWSGARLEA  | 240 |
|           | 181 | EALVGHGFTHAHIVALSQHPAALGTVAVTYQDIIRALPEATHEDIVGVGKQWSGARLEA  | 240 |
|           | 241 | LLTEAGELRGPPQLDTGQLLKIARKGGVTAVEAVHAWRNALTGAPLN              | 288 |
|           | 241 | LLTEAGELRGPPQLDTGQLLKIARKGGVTAVEAVHAWRNALTGAPLN              | 288 |

## C-terminal region

|           |      |                                                               |      |
|-----------|------|---------------------------------------------------------------|------|
| AvrXa7_C  | 1314 | FADSLERDLDAPSPMHEGDQTRASSRKRSRSDRAVTGPSAQQSFEVVRVPECCDALHLPLS | 1373 |
| Xoo1132_C | 871  | FADSLERDLDAPSPMHEGDQTRASSRKRSRSDRAVTGPSAQQSFEVVRVPECCDALHLPLS | 930  |
|           | 1374 | WRVKRPRTRIGGGLPDPGTPIAADLAASSTVMWEQDAAPFAGAADDFFAFNEEEELAWLME | 1433 |
|           | 931  | WRVKRPRTRIGGGLPDPGTPIAADLAASSTVMWEQDAAPFAGAADDFFAFNEEEELAWLME | 990  |
|           | 1434 | LLPQSGSVGGTI                                                  | 1445 |
|           | 991  | LLPQSGSVGGTI                                                  | 1002 |

Fig. S1. Alignment of the amino acid sequences of N- and C- terminal regions in Xoo1132 and AvrXa7 .

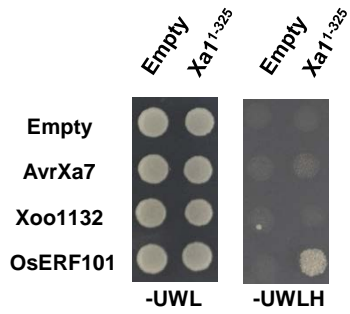

**Fig. S2. Interaction of Xa1<sup>1-325</sup> with OsERF101, Xoo1132 or AvrXa7.**

Growth of yeast colonies on -UWLH plates indicates a positive interaction.

**a**

1011bp from start codon  
**Wild type *Xa1*** CTGGTCTGCAAAGATCTGGTAATTAAAAGTCAGTTTAATGTT  
L V C K D L V I K S Q F N T

1011  
***xa1*** CTGGTCTGCAA--TCTGGTAAT**TAA**  
L V C K S G N \*  
(2bp deletion + frameshift)

**b**

190bp from start codon  
**Wild type *OsERF101*** AGGCGGCACTACAGAGGTGTTCGACAGCGGCCATGGGGGAAGTGGGCGGCG  
R R H Y R G V R Q R P W G K W A A

190  
***oserf101-1*** AGGCGGCACTACAGAGGTGTTCGACA-----GCGGCGGAGAT**TAA**  
R R H Y R G V R Q R R R \*  
(19bp deletion + frameshift)

190  
***oserf101-2*** AGGCGGCACTACAGAGGTGTTCGACAGCGGCCA**CTGGGGGAAGTGGGCGGCG**  
R R H Y R G V R Q R P **L G E V G G**  
(1bp insertion + frameshift)

**c**

190bp from start codon  
**Wild type *OsERF101*** AGGCGGCACTACAGAGGTGTTCGACAGCGGCCATGGGGGAAGTGGGCGGCG  
R R H Y R G V R Q R P W G K W A A

190  
***oserf101-3*** AGGCGGCACTACAGAGGTGTTCGACAGCGGCC-TGGGGGAAGTGGGCGGCG  
R R H Y R G V R Q R P **G G S G R**  
(1bp deletion + frameshift)

190  
***oserf101-4*** AGGCGGCACTACAGAGGTGTTCGACAGCGGCC**A**TGGGGGAAGTGGGCGGCG  
R R H Y R G V R Q R P **M G E V G G**  
(1bp insertion + frameshift)

**Fig. S3 The mutants produced in this study.**

**(A) The mutation site of *xa1*.**

**(B) The mutation sites of *oserf101-1* and *oserf101-2* in the Kyogoku background.**

**(C) The mutation sites of *oserf101-3* and *oserf101-4* in the Nipponbare background.**



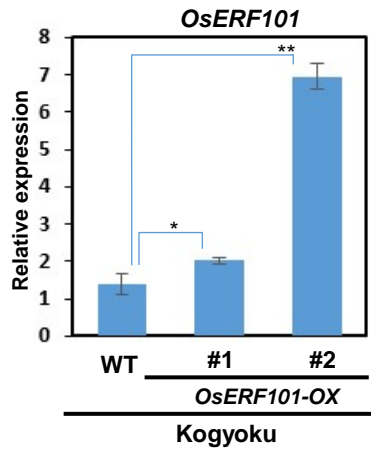

**Fig. S4** Transcript levels of *OsERF101* in the leaves of the transgenic plants overexpressing *OsERF101*.

The transcript levels were measured by quantitative real-time PCR using specific primers of *OsERF101*. *Ubiquitin* was used as a control. Values are means  $\pm$  S.E. Asterisks on the data indicate significant differences (\*;  $p < 0.05$ ; \*\*,  $p < 0.01$ ).

Table S1. Primers used in this study

| cDNA amplification           |                                                   |
|------------------------------|---------------------------------------------------|
| Xa1 F                        | GACTGGATCCGGTACATGGAGGAGGTGGAAGCCGGTTGGCTGGAG     |
| Xa1 R                        | CTGGGTCTAGATATCTTCAGTTCACATATCCCCATTAATTTTGACCTTC |
| Xa1_325 R                    | CTGGGTCTAGATATCTTCATACAATTGGCAGGACGGTTATGCC       |
| Xa1_1012 R                   | CTGGGTCTAGATATCTTCACTCCTCCAGTGAAGGGATTGAGAGTTC    |
| Xa1_312 F                    | GACTGGATCCGGTACATGAGCAATAGATCTAATGGCATAACCG       |
| Xa1_1008 F                   | GACTGGATCCGGTACATGCCTTCACTGGAGGAGCTTGTGTTAATTGC   |
| OsERF101 F                   | CACCATGGTCACCGCGCTAGCCCACGTCA                     |
| OsERF101 R                   | TCACGACGACGAATCCTTCTTCTTG                         |
| Xoo1132 F                    | GACTGGATCCGGTACATGGATCCCATTGCGTTCGCG              |
| Xoo1132 R                    | CTGGGTCTAGATATCTTCAGATCGTCCCTCCGACT               |
| Xoo1132_277 R                | TGCATGCACTGCCTCCACTGCGG                           |
| Xoo1132_871 F                | CACCATGTTGCGCGATTGCTGGAGCGTGAC                    |
| Real-time PCR                |                                                   |
| XopA F                       | ATGAAT TCTTTGAACA CACAATTC                        |
| XopA R                       | TTACTGCATC GATGCGCTGT CGCT                        |
| SWEET14 F                    | GCAATGGCTGGCATGTCTCT                              |
| SWEET14 R                    | ATGTTGCCTAGGAGACCAAAGG                            |
| ERF101 F                     | GGCTCGGAGCGCAAGAA                                 |
| ERF101 R                     | CTCAAATGCATGGCATATTCATG                           |
| ubiquitin F                  | AACCAGCTGAGGCCCAAGA                               |
| ubiquitin R                  | ACGATTGATTTAACCAGTCCATGA                          |
| Sequencing of mutaiion sites |                                                   |
| Xa1m                         | TGCCGGTGAGGGTGCATCAAATGC                          |
| OsERF101m                    | CTCGGGGAAGTTGAGCTTGGCCTTGGTC                      |

**Table S2. The candidates of the Xa1 interactors.**

| Gene ID      | Description                      |
|--------------|----------------------------------|
| Os02g0246300 | Prefoldin Domain                 |
| Os04g0398000 | Transcriptional factor(ERF)      |
| Os01g0607200 | Amino acid permease protein      |
| Os03g0215400 | Transcriptional factor(MADS box) |
| Os04g0610400 | Transcriptional factor(AP2)      |
| Os01g0715900 | Pentatricopeptide repeat domain  |
| Os03g0816700 | DUF567 family protein            |
| Os05g0494500 | DUF250 domain                    |
| Os07g0438600 | Proteinase inhibitor I9          |
| Os08g0197400 | F-box domain                     |
| Os08g0477900 | Transcriptional factor (bHLH)    |
| Os11g0106400 | Ubiquitin-activating enzyme E1 2 |
